# Supplementary material for: BiOCl/SnS2 hollow spheres for the photocatalytic degradation of waste water
Source: Royal Society of Chemistry journal article supplement (doi:10.1039/c5ra22526d), 2015-01-01
Supplement: c5ra22526d1.pdf [file c5ra22526d1.pdf]

1

### Supporting information

2

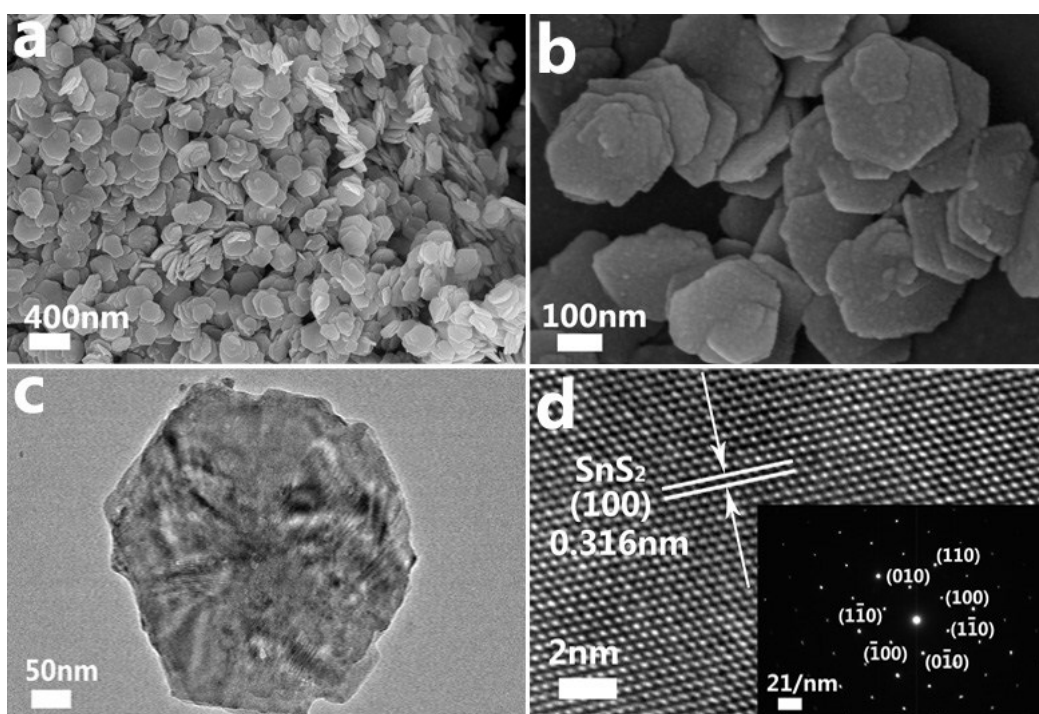

3

4 Fig. S1 FESEM images (a, b) and FETEM images (c, d) of as prepared SnS<sub>2</sub> hexagon

5

nanoflakes. Inset in d is the SAED pattern.

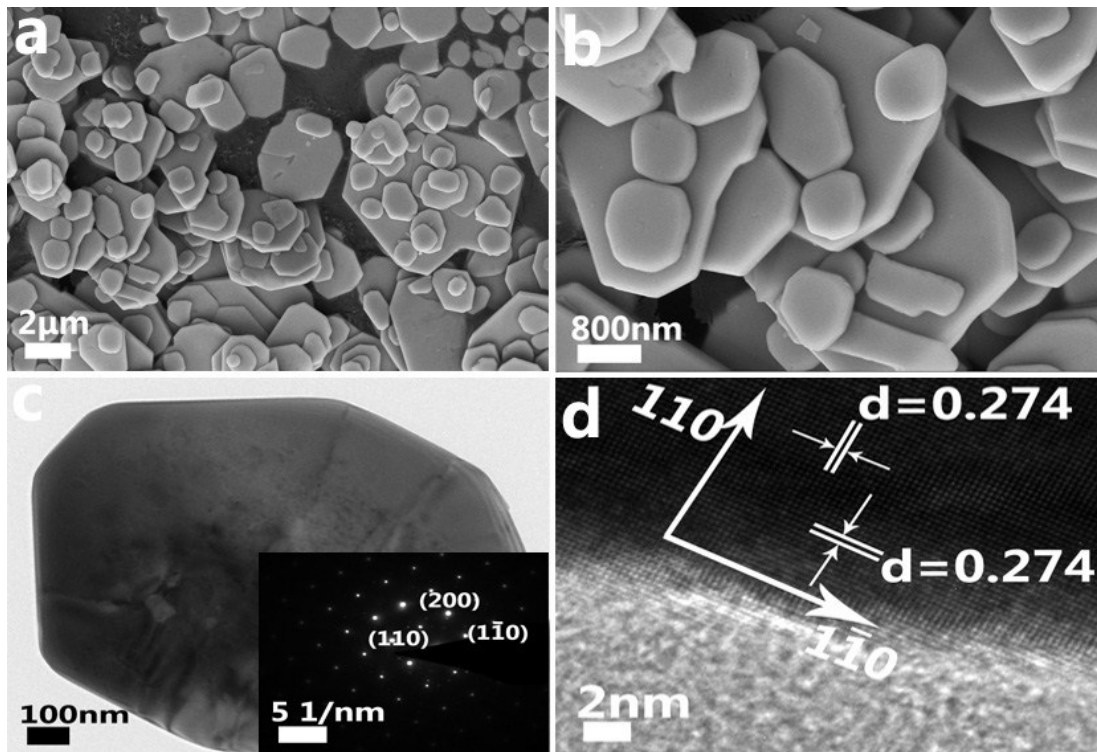

1

2

3

Fig. S2 FESEM images (a, b) and FETEM images (c, d) of as prepared BiOCl nanoflakes. Inset in c is the SAED pattern.

1

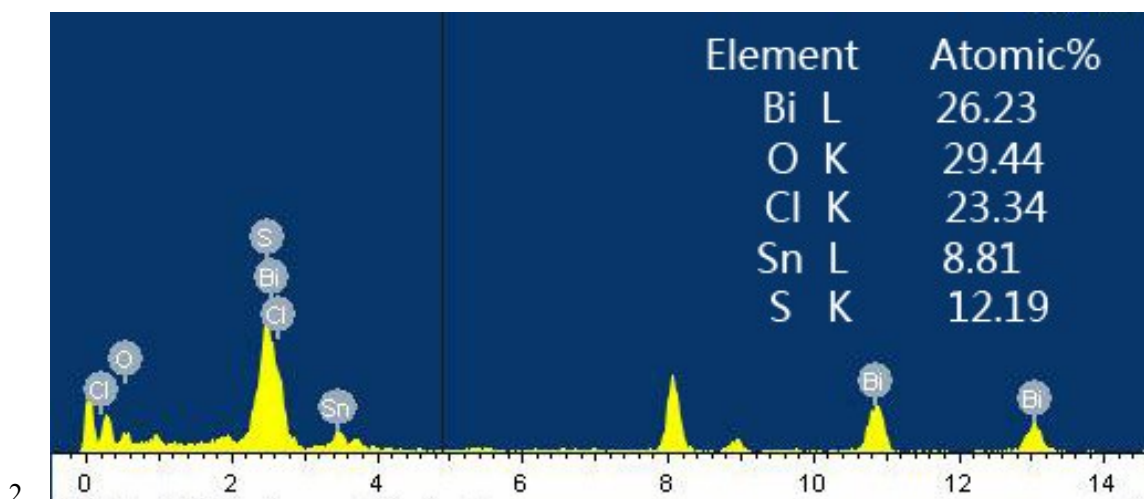

2

3 Fig. S3 EDS analysis of the elemental information and atomic percentages of the

4

SnS<sub>2</sub>-incorporated BiOCl hollow spheres.

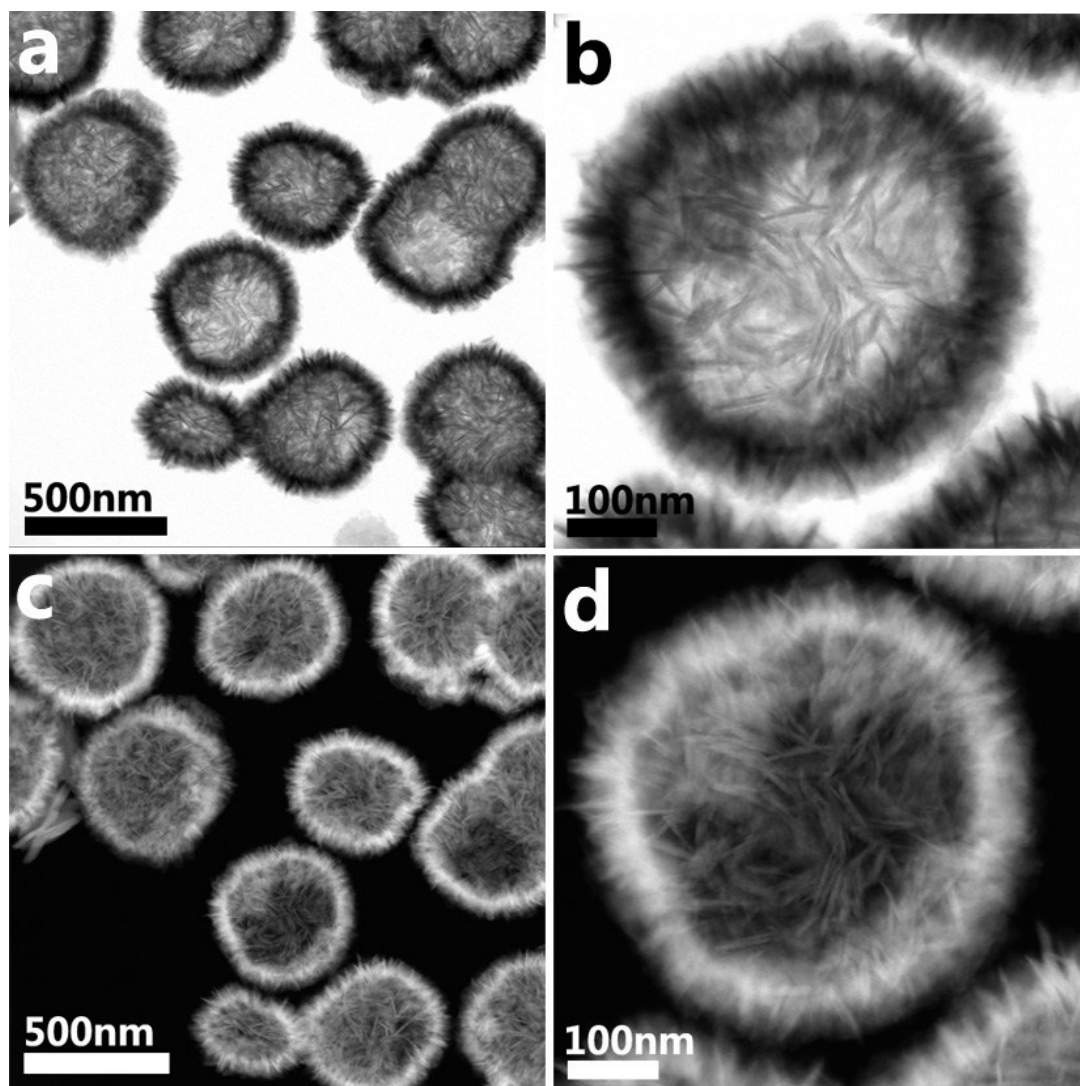

1  
2  
3

Fig. S4 BF-STEM images (a, b) and HAADF-STEM images (c, d) of SnS<sub>2</sub>-incorporated BiOCl hollow spheres.

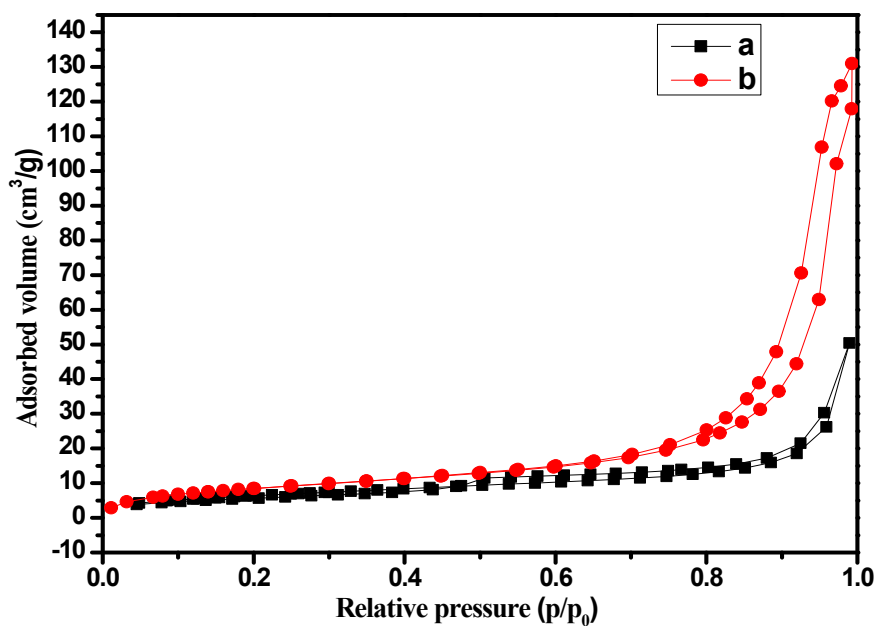

1  
 2 Fig. S5 N<sub>2</sub> adsorption-desorption isotherms and pore-size distribution (inset) of (a)  
 3 SnS<sub>2</sub>-incorporated BiOCl of flower-like structure, (b) SnS<sub>2</sub>-incorporated BiOCl hollow  
 4 spheres.

5  
 6  
 7  
 8 Table 1 BET properties of SnS<sub>2</sub>-incorporated BiOCl samples with different structures.

| Samples                                                       | A <sub>BET</sub> (m <sup>2</sup> g <sup>-1</sup> ) | V <sub>BJH</sub> (cm <sup>3</sup> g <sup>-1</sup> ) | Average pore size (Å) |
|---------------------------------------------------------------|----------------------------------------------------|-----------------------------------------------------|-----------------------|
| SnS <sub>2</sub> -incorporated BiOCl of flower-like structure | 23.4383                                            | 0.077999                                            | 19.39808              |
| SnS <sub>2</sub> -incorporated BiOCl hollow spheres           | 32.5639                                            | 0.157919                                            | 133.1134              |

9  
 10  
 11  
 12  
 13  
 14  
 15  
 16  
 17  
 18  
 19  
 20

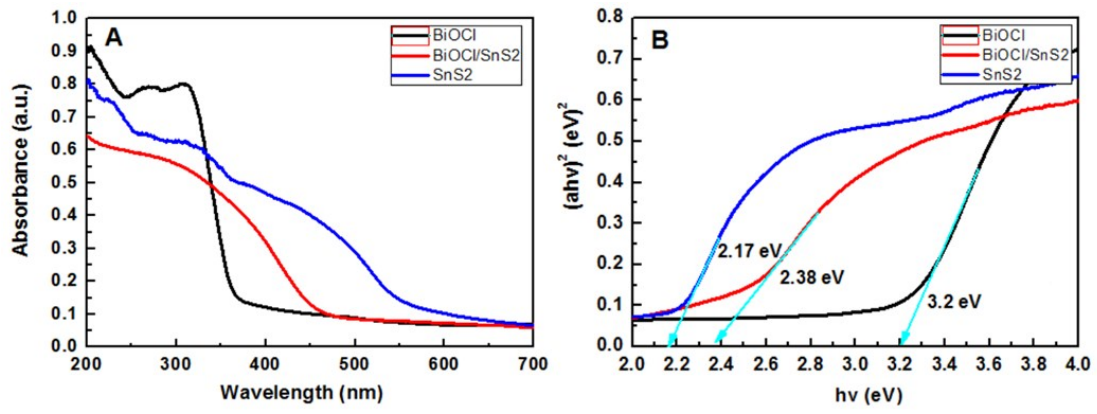

1  
 2 Fig. S6 UV-vis diffuse reflectance spectra (A) and (B) the plot of  $(\alpha h\nu)^{1/2}$  vs band gap  
 3 energy ( $h\nu$ ) of pure SnS<sub>2</sub>, pure BiOCl, BiOCl/SnS<sub>2</sub>.  
 4

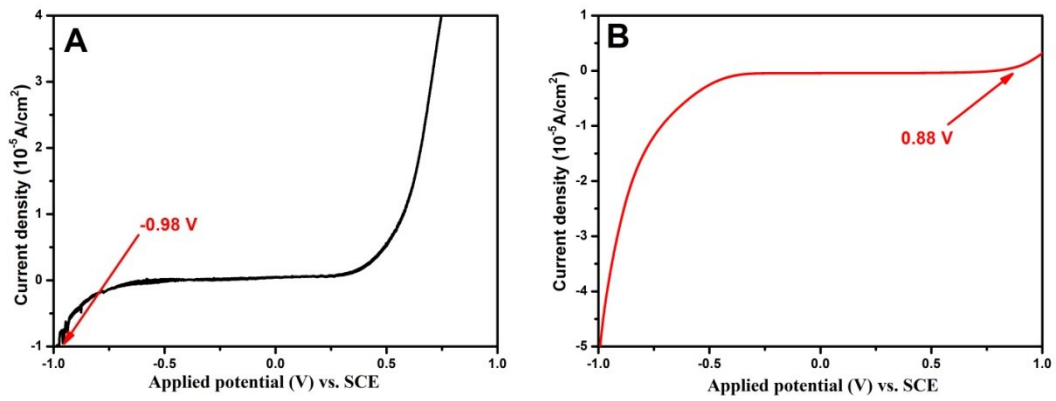

1

2

3

Fig. S7 Current-potential curves for (A) SnS<sub>2</sub> and (B) BiOCl under Xe light irradiation ( $\lambda > 420$  nm).

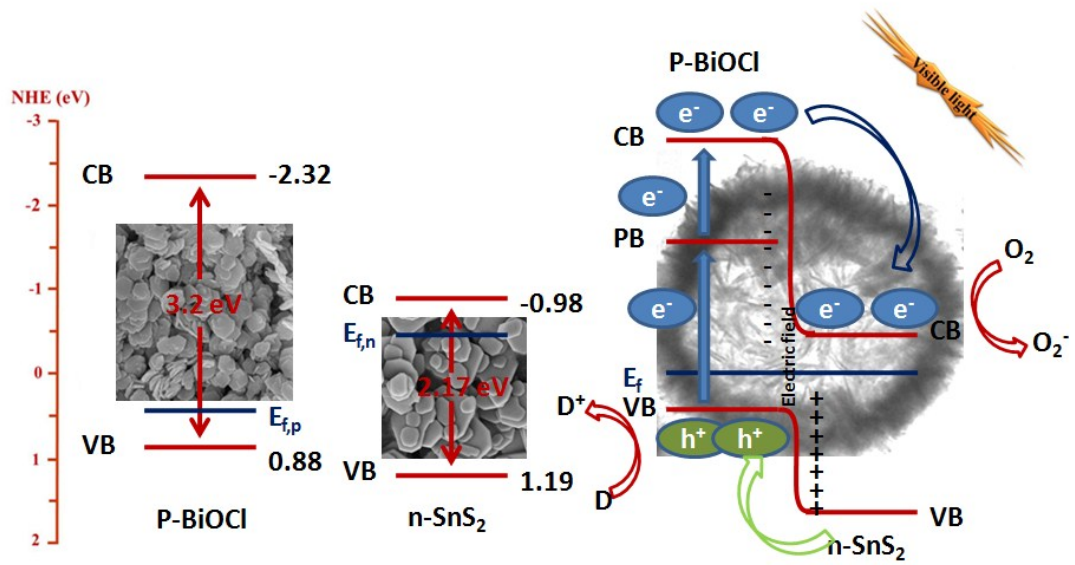

1

2 Fig. S8 Schematic diagrams of energy bands of p-BiOCl, n-SnS<sub>2</sub> and the p-BiOCl/n-  
 3 SnS<sub>2</sub> junction. The energy band diagram at equilibrium and transfer of photoinduced  
 4 electrons from p-BiOCl and n-SnS<sub>2</sub> under visible-light irradiation are also described.

5

6
